# Supplementary material for: Antimalarial target vulnerability of the putative Plasmodium falciparum methionine synthase
Source: PeerJ journal article supplement (doi:10.7717/peerj.16595), 2024-01-15
Supplement: FigS1.pdf [file FigS1.pdf]

PF3D7 1233700 **PIEIVPKMKKIQ--NVNCTNKDETNINITHN-----N-----NNNDNIFFNKKLFNYGIEYYIDVSDQ**  
PKH 145080 -----EVEGSLMHRQNLDPDIEMVPL--SSTQ-----RS-----ATSTEDFPNKHFFNYGLEYYIDVRDE  
PmUG01 14067900 -----YTTRN--MTKRSSVEFIPI-ARRV-----D-----KKRCNMVASPKLFNYGLEYYIDVSDQ  
PowCR01 1400537 -----AAIPRCKVHLQ--HSNRSMIQMTPR-SGMK-----S-----KEKCNWLRNWKLFNYGIEYYIDVSDM  
PocGH01\_1405930 -----ANIPRCKVHLQ--HSSRSIIQMTPR-SGMK-----S-----KEKCNWLLNWKLFNYGIEYYIDVSDM  
PVX 100640 -----LHADDQPPSIKMIPV--SSRESGRE-----RG-----GPSREAAPNRHLFNYGLEYYIDVSDM  
meth -----AAMVRFNLNLIAGEPDIARVPI-MIDSSKWDVIEKGLKCIQGGKIVNSISMKEGVDAFIHAKLLRRYGAADVMAFDE  
MTR -----SAMTRFCNLIASEPDIKAVPL-CIDSSNFAVIEAGLKCCQGGKIVNSISLKEGEDDFLEKARKIKKYGAAMVMAFDE

cons 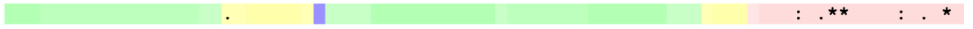

PF3D7 1233700 **EI-----I-SNCLFKLNT**  
PKH 145080 **EI-----I-SNSKFRIDS**  
PmUG01 14067900 **EI-----I-ASNCKFKLQC**  
PowCR01 1400537 **EV-----I-SNCKLKLEC**  
PocGH01\_1405930 **EV-----I-SNCKFKLEC**  
PVX 100640 **EI-----I-SNCKFKLGA**  
meth **QQQADTRARKIEICRRAYKILTEEVGFPPEDIIFDPNIFAVATGIEEHNNYAQDFIGACEDIKRELPHALISGGVSNVSFSFRG**  
MTR **EQQATETDTKIRVCTRAYHLLVKKLGFNPNDIIFDPNILTIGTGMEENLYAINFIHATKVIKETLPGARISGGLSNLSFSFRG**

cons 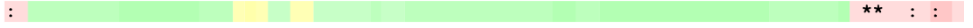

PF3D7 1233700 **FCKNSDKLH-----**  
PKH 145080 **YKRNEHKLQ-----**  
PmUG01 14067900 **FCRNTNKLN-----**  
PowCR01 1400537 **FTRNREKLH-----**  
PocGH01\_1405930 **FTRNREKLH-----**  
PVX 100640 **YKRNEEKLH-----**  
meth **NDPVREAIHAVFLYYAIRNGMDMGIVNAGQLAIYDDLPAELRDAVEDVILNRRDDGTERLLELAEKYRGSKTDDTANAQQAEWR**  
MTR **MEAIREAMHGVSFLYHAIKSGMDMGIVNAGNLPVYDDIHKELLQLCEDLIWNKDPATEKLLRYAQT-QG--TGKKVIQTDEWR**

cons 

PF3D7 1233700 -----LFSLTTFSNIRE---VLTFFY  
PKH 145080 -----LFSVITSSNVRE---VFTLY  
PmUG01 14067900 -----FFSLTTFSNIRE---VLTFFY  
PowCR01 1400537 -----FFSLTTSSNVRE---IFTFY  
PocGH01\_1405930 -----FFSLTTSSNVRE---IFTFY  
PVX 100640 -----LFSLLTSSNVRE---VLTLY  
meth **SWEVNRKLEYSLVKGITIEEQDTEEAR---QQATRIPIEVIEGPLMDGMNVVGDVLFEGKMLPQVVK SARVMKQAVAYLEPFI**  
MTR **NGPVEERLEYALVKGIEKHIIEDETEARLNQKKYPRPLNIIEGPLMNGMKIVGDVLFAGKMLPQVTKSARVMKKA VGHILPFI**

cons 

PF3D7 1233700 **NC-----IKYYGSTFNKNVNIINFFCNSCKYVGCSSKYSFFDIVSILLYLDSYNKYIKAIGLNCVNIIEV-YDLFYPFKKY**  
PKH 145080 **HH-----LKTGGGFEEKNVVVSFYCNSNKNIGCTDYSFLDMVLTLLYLDNRNHFKAIGVNCVNIIDV-RELILPLTRC**  
PmUG01 14067900 **NY-----IKYYASNFKNVNIINFCNSCKYVGCSSKYSFFDIVSILLYLDSYNKFINAIGINCVMNIENV-YDLFFPFKKY**  
PowCR01 1400537 **NF-----LKYYGNNFRNSVNIINFCNDIYHIGCSIYSFFDIICILLYLDAHNKYIYAIGLNCVNIIEV-YDIFLFPFKKY**  
PocGH01\_1405930 **NF-----LKYYGNNFRNSVNIINFCNDIYHIGCSIYSFFDIICILLYLDAHNKYIYAIGLNCVNIIEV-YDIFLFPFKKY**  
PVX 100640 **SH-----LVKCGGHFDTNVVVSFYCNDGQHIGCSGSYFVDDVLLILLYLDSNRNRFKAIGLNCVSIIDV-RELFAPLTRC**  
meth **EASKE-----QGTNGKMVIATVKGDVHDIG-----KNIVGVVLQCNNYIYDLGVMVPAEKI**  
MTR **EKEREETRVLNGTVEEDPYQGTIVLATVKGDVHDIG-----KNIVGVVLGCNNFRVIDLGVMTPCDKI**

cons 

PF3D7 1233700 **ICPYNNINT-----**  
PKH 145080 **IKPDGNIDV-----**  
PmUG01 14067900 **TCPYININE-----**  
PowCR01 1400537 **LCPYKNINV-----**  
PocGH01\_1405930 **LCPYKNIIV-----**  
PVX 100640 **ISSDGTVDV-----**  
meth **LRTAKEVNADLIGLSGLITPSLDEMIVNAKEMERQGFITPLLIGGATTSKAHTAVKIEQNYSGPTVYVQNASRTVGVVAALLSD**  
MTR **LKAALDHRKADIIGLSGLITPSLDEMIVNAKEMERLAIRIPLLIGGATTSKHTAVKIAIPRY SAPVIHVLDASKSVVVCSQLLDE**

cons 

PF3D7 1233700 -----  
PKH 145080 -----  
PmUG01 14067900 -----  
PowCR01 1400537 -----  
PocGH01\_1405930 -----  
PVX 100640 -----  
meth **TQRDDFVARTRKEYETVRIQHGRRKPRTPPVTLAARDNDFAFDQAYTPPVVAH-RLGVQVEEA-SIETLRNYIDWTPPFMTWS**  
MTR **NLKDEYFEEIMEEYEDIRQDHYESLKERRYPLPSQARKSGFQMDWLSEPHVVKPTFIGTQVFEDYDLQKLVYIDWKPFDFVWQ**

cons 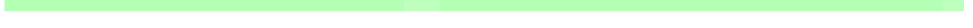

PF3D7 1233700 -----  
PKH 145080 -----  
PmUG01 14067900 -----  
PowCR01 1400537 -----  
PocGH01\_1405930 -----

```

PVX 100640
meth
MTR
-----RILEDEVVGVGVEAQRLEFKDANDMLDKLSAEKTLNPRGVVGLFPANRVGDDIEIYRDET---RTHVINVSHHLRQ
LAGKYP-----RILEDEVVGVGVEAQRLEFKDANDMLDKLSAEKTLNPRGVVGLFPANRVGDDIEIYRDET---RTHVINVSHHLRQ
LRGKYPNRGFPKIFNDKTVGGGEARKVYDDAHNMLNLTLSQKKLRARGVVGFWPAQSIQDDIHLAYAEAAVPAQAEPIATFFYGLRQ

cons
-----

PF3D7 1233700
PKH 145080
PmUG01 14067900
PowCR01 1400537
PocGH01 1405930
PVX 100640
meth
MTR
-----NLYHSQNIQMNIVKDVMDLKKNRYIND-----FNF
-----NAYPCPNGELGRLIKTVLKD LKKNTYLGD-----IHF
-----DSYKSONSQINSIVKTALRSLKKNRYIQD-----VNF
-----NMYRSENQEFDSIMKTVLNDLNKNRYIYD-----VNL
-----NMYRSENQEFDSIMKTVLNDLNKNRYIYD-----VNF
-----DAYGSPSGELSGLTKTILKGLKKNRFLGD-----IHF
QTEKTGFAN---YCLAD FVAPKLSGKADYIGAFAVTGGLEEDALADAFEAQHDDYNKIMVKALADRLAEAFAYLHERVRKYYW
QAEKDSASTEPYCYLSDFIAPLHSGIRDYLG LFAVACF-GVEELSKAYEDDGDYSSIMVKALGDRLAEAFAYLHERVRRELW

cons
-----

PF3D7 1233700
PKH 145080
PmUG01 14067900
PowCR01 1400537
PocGH01 1405930
PVX 100640
meth
MTR
F-----CSPNKSLVVVSFDDQNGDVHF-----
F-----ASPNKSLNRRVTYDHSRNDIQF-----
F-----CSPNKSLQVVSFDNSTNEVTF-----
F-----CSPNKSLQVVSFDNSTNEVTF-----
F-----CSPNKSLQVVSFDNSTNEVTF-----
F-----CSPNKSLQVVSFDNSTNEVTF-----
F-----ASPNKSLNRRVTYDYGQGEVHF-----
GYAPNENLSNEELIRENYQGIRPAGYPACPEHTEKATIWELLEVEKHTGMKLTESFAMWPGASVSGWYFSPHD-SKYVAVAQI
AYCGSEQLDVADLRRLRYKIRPAGYPSQPDHTEKLTMWRLADIEQSTGIRLTESLAMAPASAVSGLYFSNLK-SKYFAVGKI

cons
-----

PF3D7 1233700
PKH 145080
PmUG01 14067900
PowCR01 1400537
PocGH01 1405930
PVX 100640
meth
MTR
-----HNSANKTNHVYNYIEKWINVHVNGFGGCCYYNPYDISLINYKINELL-----
-----DISQKRHKHLYNYVGDWIDVGLTGFGGCCYYNPYDISLLDYKLG RMAQMQ-----
-----HTLPNKTDHVYNYVDKWMVEVINGFGGCCYYNPYDVS LIDYKLGRLCR-----
-----ETTSKKINHVNYLERWIDLGINGFGGCCYYNPYDISLIDYKLS SIFSSGTN-----
-----ETTSKRINHVNYLESWIDLGINGFGGCCYYNPYDISLIDYKLS SIFSSGTN-----
-----ETTQERHKHVCNYVGEWLHVGLSGFGGCCYYNPYDISLLDYKLGQLAGGVAVREKQR
QRDQVEDYARRKGM SVTEVERWLPNL-G-----YDAD
SKDQVEDYALRKNISVAEVEKWLGPIL-G-----YDTD

cons
-----

```

Fig. S1.
