# Supplementary material for: Antimalarial target vulnerability of the putative Plasmodium falciparum methionine synthase
Source: PeerJ. 2024 Jan 15;12:e16595. doi: 10.7717/peerj.16595 (PMC10795524; doi:10.7717/peerj.16595)
Supplement: Supplemental Information 4 — Sequences of primers used for cloning and PCR genotyping. [file peerj-12-16595-s004.xlsx]

## Sheet: Sheet1
Name	Sequence 5′®3′
MS_gRNA_top	ATTGAATAACCTTATTATTAAATGG
MS_gRNA_bottom	AAACCATTTAATAATAAGGTTATTC
MS_HR1_fwd	TTGTCTGCAGGATGAAAAATCCCAAGGAAAAAAAAAAAAAAATATG
MS_HR1_rev	GATGACTTTGTTGTTGAAGGTGGATCCATAATATTTTATACAATTATAAAATGTTAATAC
MS_HR2_fwd	TGATATAGGTCTTAAGGTACCCATTTAATAATAAGGTTATTATAAATTTTTTTTGTAACAG
MS_HR2_rev	ATTTTTCATCCTGCAGACAACACCCACCAAAACC
MS_5IntF	TAGCGAATTAGGGCGTCTTG
MS_5recodonR	CCCGATTGCCTTGATGTACT
glmS_3R	CCTTACGGCTGTGATCTG
DHFR-TS_gRNA_top	ATTGtaaggatatgggaagctaa
DHFR-TS_gRNA_bottom	AAACttagcttcccatatcctta
DHFR_37F	GGGCCATATGTGCATGTTGTAAGG
DHFRTS_1558R	AGGTACTCCTAGCCCTAAATCA
DHFR-TS_HR1_fwd	cggttaagaactgcagAAGAACAAGCTGGGAAAG
DHFR-TS_HR1_rev	TTAGCTTCCCATATCCTTAC
DHFR-TS_HR2_fwd	tgatataggtcttaaggtaccTGGTACTAGGGAATTTTTAGATAATAG
DHFR-TS_HR2_rev	gcttgttcttctgcagTTCTTAACCGTTCAGGTAATTTTG
