# Supplementary material for: Antimalarial target vulnerability of the putative Plasmodium falciparum methionine synthase
Source: PeerJ. 2024 Jan 15;12:e16595. doi: 10.7717/peerj.16595 (PMC10795524; doi:10.7717/peerj.16595)
Supplement: Supplemental Information 5 — The X-ray structure of the homocysteine and 5-methyltetrahydrofolate binding fragment of Thermotoga maritima cobalamin-dependent methionine synthase co-complexed with Hcy and 5-mTHF (Evans et al., 2004) was used as a query for searching proteins with homologous structures in the Plasmodium falciparum 3D7 proteome. The PDB accession number (1q8j) was inputted as a query source to the Foldseek web tool (Van Kempen et al., 2023). Target search was restricted to the AlphaFold/Proteome v4 P. falciparum 3D7 database of 5,187 ab initio predicted protein structures using the 3Di/AA mode. Targets are ranked by Foldseek scores. [file peerj-12-16595-s005.xlsx]

## Sheet: 1q8j_foldseek_results
Target	Gene Name	PlasmoDB Description	Probability.	Sequence Identity	E-Value	Score	Query Pos.	Target Pos.
AF-Q8I585-F1-model_v4	PF3D7_1233700	Homocysteine S-methyltransferase, putative	1	10.6	1.31e-05	148	12-286 (559)	2-576 (581)
AF-Q8IAU3-F1-model_v4	PF3D7_0810800	hydroxymethyldihydropterin pyrophosphokinase-dihydropteroate synthase	1	13.2	8.19e-05	141	298-556 (559)	373-705 (706)
AF-C6KSS1-F1-model_v4	PF3D7_0607300	Uroporphyrinogen decarboxylase	1	11.5	0.000154	113	15-287 (559)	81-407 (413)
AF-Q8I4R4-F1-model_v4	PF3D7_1252200	Chitinase	1	13.6	0.00017	117	2-287 (559)	38-377 (378)
AF-Q8I5L3-F1-model_v4	PF3D7_1219900	Ribulose-phosphate 3-epimerase	1	11.6	0.0107	92	12-289 (559)	3-227 (227)
AF-A0A144A4G4-F1-model_v4	PF3D7_1439900	Triosephosphate isomerase	0.99	8.4	0.019	85	13-286 (559)	2-247 (248)
AF-A0A144A3T1-F1-model_v4	PF3D7_1444800	Fructose-bisphosphate aldolase	0.72	8.8	0.0222	58	4-296 (559)	19-355 (369)
AF-Q8IJH3-F1-model_v4	PF3D7_1023200	Orotidine 5'-phosphate decarboxylase	0.97	11.9	0.026	76	328-557 (559)	77-319 (323)
AF-Q8IM07-F1-model_v4	PF3D7_1408900	tRNA-dihydrouridine synthase	0.96	8.3	0.0274	73	9-272 (559)	21-240 (340)
AF-A0A5K1K8R3-F1-model_v4	PF3D7_1363700	Indole-3-glycerol-phosphate synthase	0.91	13.2	0.0542	68	38-288 (559)	260-456 (790)
AF-Q8IDQ0-F1-model_v4	PF3D7_1344600	Lipoyl synthase, apicoplast	0.93	11.5	0.0782	70	40-229 (559)	199-385 (415)
AF-Q8IL68-F1-model_v4	PF3D7_1440300	Delta-aminolevulinic acid dehydratase	0.82	9.5	0.0915	62	16-285 (559)	127-428 (451)
AF-C6KT50-F1-model_v4	PF3D7_0621200	Pyridoxal 5'-phosphate synthase subunit Pdx1	0.8	8.5	0.102	61	5-298 (559)	5-280 (301)
AF-Q8IJA9-F1-model_v4	PF3D7_1029600	Adenosine deaminase	0.57	12.6	0.132	53	8-283 (559)	74-319 (367)
AF-Q8IE02-F1-model_v4	PF3D7_1332600	DNA-(Apurinic or apyrimidinic site) lyase 1, putative	0.57	10.2	0.132	53	5-286 (559)	305-587 (597)
AF-Q08210-F1-model_v4	PF3D7_0603300	Dihydroorotate dehydrogenase (quinone), mitochondrial	0.63	8.2	0.154	55	17-286 (559)	222-536 (569)
AF-O77370-F1-model_v4	PF3D7_0318800	Triosephosphate isomerase	0.57	9	0.172	53	5-287 (559)	94-356 (357)
AF-Q8IKA9-F1-model_v4	PF3D7_1472900	Dihydroorotase	0.63	7.7	0.201	55	298-508 (559)	2-194 (358)
AF-Q8I2U5-F1-model_v4	PF3D7_0920800	Inosine-5'-monophosphate dehydrogenase	0.69	11.3	0.223	57	87-270 (559)	207-368 (510)
AF-Q8IM25-F1-model_v4	PF3D7_1406900	Radical SAM protein, putative	0.44	10.1	0.397	49	357-472 (559)	183-325 (362)
AF-Q8IM31-F1-model_v4	PF3D7_1406300	Glycerophosphodiester phosphodiesterase	0.41	6.6	0.441	48	370-554 (559)	256-472 (475)
AF-Q8I2V6-F1-model_v4	PF3D7_0919700	Pyridoxal phosphate homeostasis protein	0.57	11.6	0.441	53	314-538 (559)	28-237 (242)
AF-Q8IJI7-F1-model_v4	PF3D7_1021600	2-deoxy-D-ribose 5-phosphate aldolase	0.33	12.6	0.635	45	1-287 (559)	1-257 (263)
AF-A0A144A3R0-F1-model_v4	PF3D7_1434100	Queuine tRNA-ribosyltransferase, putative	0.18	8.9	0.784	38	299-536 (559)	7-268 (407)
AF-Q8I2H2-F1-model_v4	PF3D7_0934600	Uncharacterized protein	0.21	9.4	0.966	40	328-472 (559)	19-187 (188)
AF-Q8IJ77-F1-model_v4	PF3D7_1033100	S-adenosylmethionine decarboxylase/ornithine decarboxylase	0.11	10.7	1.63	32	322-557 (559)	854-1119 (1434)
AF-Q8I3Q5-F1-model_v4	PF3D7_0520500	Phosphomethylpyrimidine kinase, putative	0.09	9.9	3.58	30	339-458 (559)	58-180 (310)
AF-A0A143ZWL7-F1-model_v4	PF3D7_1008700	Tubulin beta chain	0.04	11.8	4.41	23	120-234 (559)	105-204 (445)
AF-A0A144A0U1-F1-model_v4	PF3D7_1249600	Leucine-rich repeat protein	0.04	11.1	4.9	23	74-222 (559)	377-509 (848)
AF-A0A144A431-F1-model_v4	PF3D7_1427900	Leucine-rich repeat protein	0.04	17.7	4.9	22	344-466 (559)	48-197 (281)
AF-O97284-F1-model_v4	PF3D7_1021600	Nicotinamidase, putative	0.08	17.9	6.04	28	440-545 (559)	341-428 (429)
AF-O96151-F1-model_v4	PF3D7_0205600	Uncharacterized protein	0.04	11.5	7.85	22	372-550 (559)	16-173 (635)
AF-C6KSW9-F1-model_v4	PF3D7_0612600	Cytoplasmic tRNA 2-thiolation protein 1	0.04	11	8.72	22	407-507 (559)	50-166 (482)
AF-Q8IJW3-F1-model_v4	PF3D7_1008000	Histone deacetylase 2	0.04	13.8	9.68	23	185-290 (559)	1194-1290 (2379)
AF-Q6LFD5-F1-model_v4	PF3D7_0613400	Putative 50S ribosomal protein L18, apicoplastic	0.13	14	9.68	34	117-164 (559)	160-209 (213)
AF-Q8IK81-F1-model_v4	PF3D7_1475700	Tubulin epsilon chain, putative	0.03	8.8	9.68	21	121-234 (559)	120-214 (519)
